# Supplementary material for: Relationships between center atom species (N, P) and ionic conductivity, viscosity, density, self-diffusion coefficient of quaternary cation room-temperature ionic liquids
Source: Royal Society of Chemistry journal article supplement (doi:10.1039/b820343a), 2009-01-01
Supplement: b820343a.pdf [file b820343a.pdf]

**Electronic Supplementary Information**

**Relationships between center atom species (N, P) and ionic conductivity,  
viscosity, density, self-diffusion coefficient of quaternary cation  
room-temperature ionic liquids**

Shiro Seki,<sup>\*a</sup> Kikuko Hayamizu,<sup>b</sup> Seiji Tsuzuki,<sup>b</sup> Kenta Fujii,<sup>c</sup> Yasuhiro Umebayashi,<sup>d</sup> Takushi Mitsugi,<sup>d</sup> Takeshi Kobayashi,<sup>a</sup> Yasutaka Ohno,<sup>a</sup> Yo Kobayashi,<sup>a</sup> Yuichi Mita,<sup>a</sup> Hajime Miyashiro<sup>a</sup> and Shin-ichi Ishiguro<sup>d</sup>

<sup>a</sup> Materials Science Research Laboratory, Central Research Institute of Electric Power Industry (CRIEPI), 2-11-1, Iwado-kita, Komae, Tokyo 201-8511, Japan.

<sup>b</sup> National Institute of Advanced Industrial Science and Technology (AIST), Tsukuba Center, Tsukuba, Ibaraki 305-8565, Japan

<sup>c</sup> Department of Chemistry and Applied Chemistry, Faculty of Science and Engineering, Saga University, Honjo-machi, Saga 840-8502, Japan

<sup>d</sup> Department of Chemistry, Faculty of Science, Kyushu University, Hakozaki, Higashi-ku, Fukuoka 812-8581, Japan

**Table S1: Densities, Viscosities, Ionic conductivities, Self-diffusion Coefficients, and Molar Conductivities of TEPA-TFSA and TEPP-TFSA at 30 °C**

|           | $\rho$ | $\eta$ | $\sigma$ | $D_{\text{cation}}$ | $D_{\text{anion}}$ | $A_{\text{imp}}$ | $A_{\text{NMR}}$ |
|-----------|--------|--------|----------|---------------------|--------------------|------------------|------------------|
| TEPA-TFSA | 1.306  | 127.2  | 1.34     | 9.09E-12            | 9.23E-12           | 0.507            | 0.677            |
| TEPP-TFSA | 1.298  | 68.2   | 2.06     | 1.39E-11            | 1.5E-11            | 0.746            | 1.068            |

$\rho$  : g cm<sup>-3</sup>

$\eta$  : mPas

$\sigma$  : mScm<sup>-1</sup>

$D_{\text{cation}}, D_{\text{anion}}$  : m<sup>2</sup>s<sup>-1</sup>

$A_{\text{imp}}, A_{\text{NMR}}$  : Scm<sup>2</sup>mol<sup>-1</sup>
